# Supplementary material for: Non-canonical NFκB activation promotes chemokine expression in podocytes
Source: PubMed Central journal article supplement (PMC4926283; doi:10.1038/srep28857), 2016-06-29
Supplement: srep28857-s1.pdf [file srep28857-s1.pdf]

# **Non-canonical NFκB activation promotes chemokine expression in podocytes**

Lara Valiño-Rivas <sup>1,2</sup>, Laura Gonzalez-Lafuente <sup>1,2</sup>, Ana B Sanz <sup>1,2</sup>,  
Marta Ruiz-Ortega <sup>1,2</sup>, Alberto Ortiz <sup>1,2\*</sup>, Maria D Sanchez-Niño <sup>1,2\*</sup>

**A)**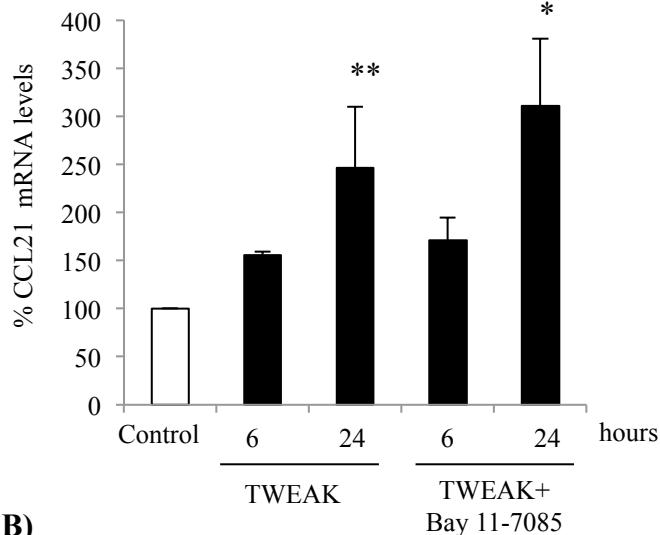**B)**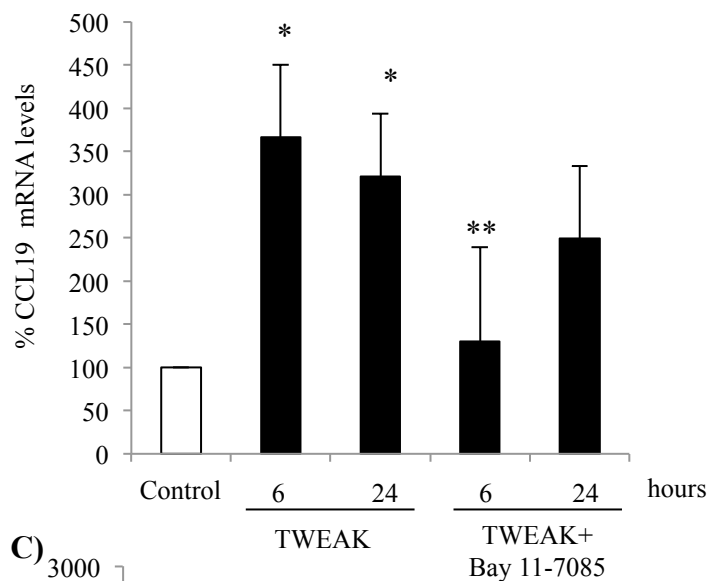**C)**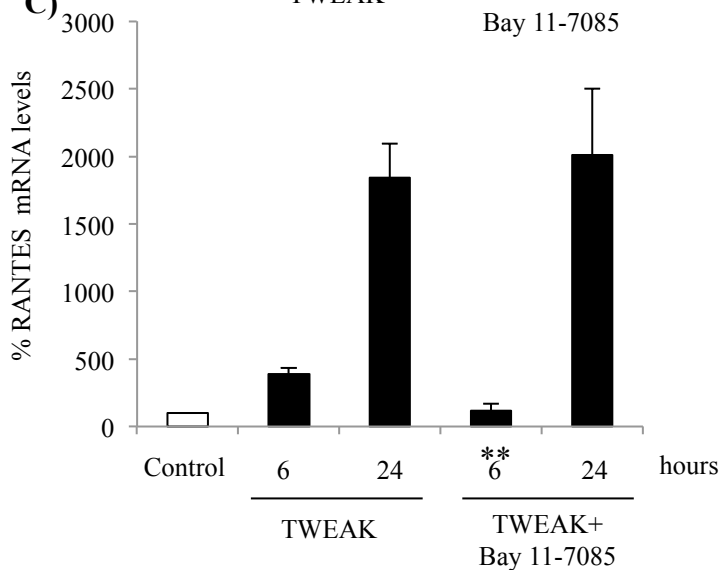

**Supplementary figure 1. Targeting canonical NF $\kappa$ B activation modulates RANTES and CCL19 but not CCL21 expression in podocytes.** Podocytes were pre-treated with 10  $\mu$ M Bay 11-7085 and 1 hour later with 100 ng/mL TWEAK. **A)** CCL21 mRNA. \*\* $p$ <0.001 vs control. **B)** CCL19 mRNA. \* $p$ <0.001 vs control. \*\* $p$ <0.05 vs TWEAK 6h. **C)** RANTES mRNA. \* $p$ <0.01 vs Control, \*\* $p$ <0.009 vs TWEAK 6h. Expression of mRNA was assessed by real time RT-PCR. Mean  $\pm$  SEM of three independent experiments.

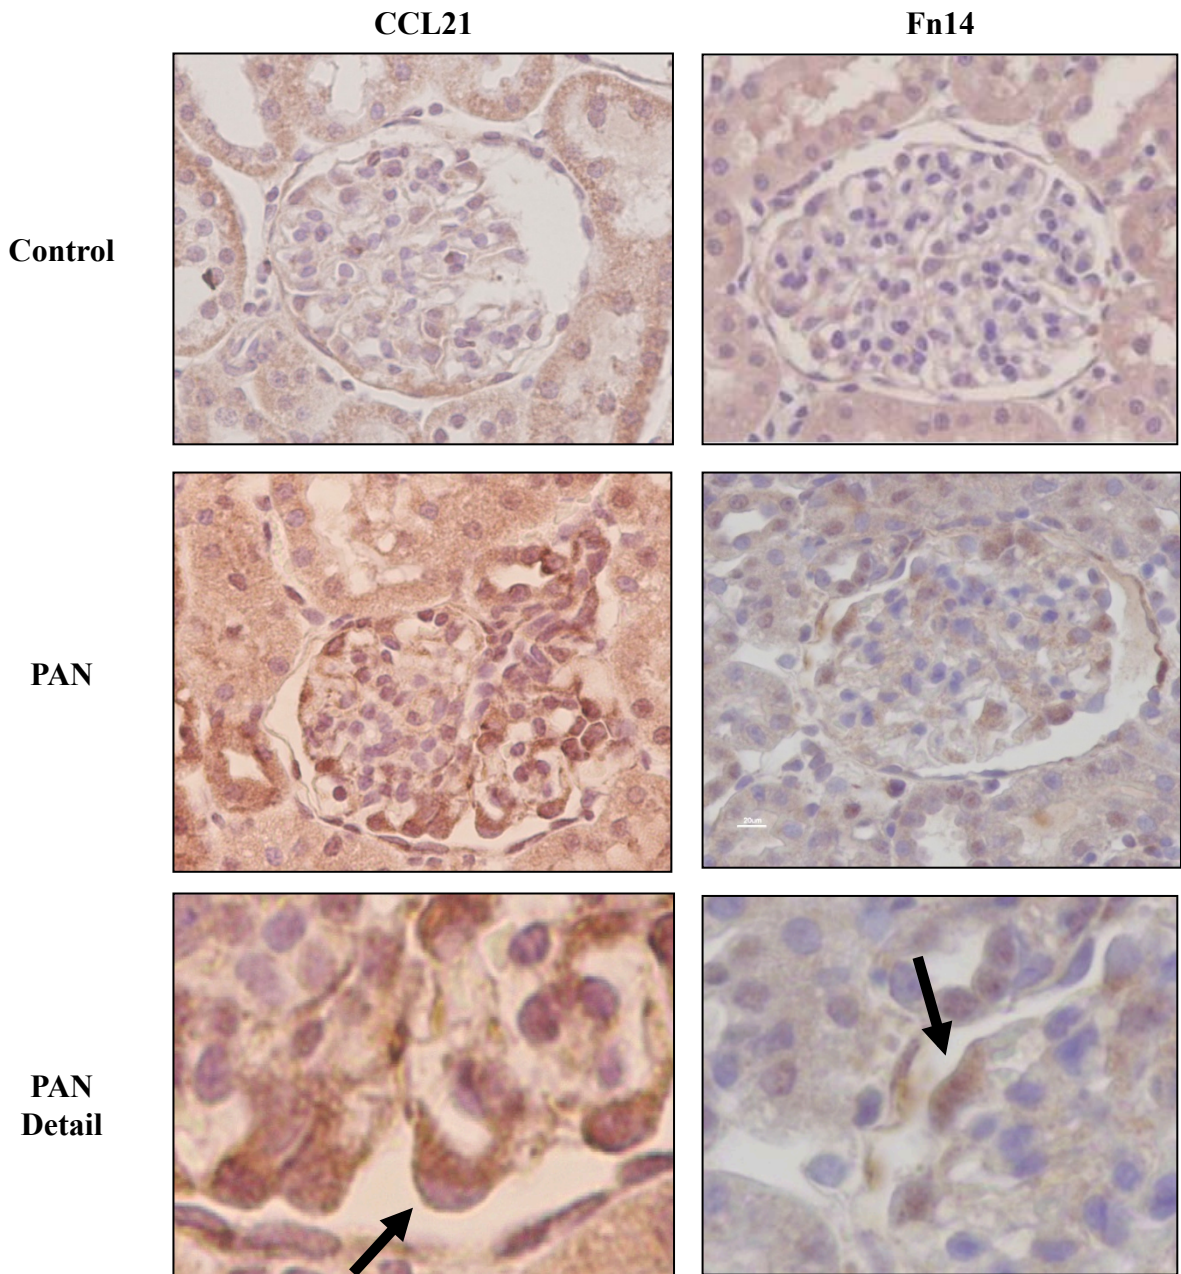

**Supplementary figure 2. Fn14 and CCL21 upregulation in PAN nephrosis. Immunohistochemistry.** Fn14 and CCL21 immunohistochemistry 10 days following PAN or vehicle injection. Note podocyte expression of Fn14 and CCL21 in PAN-treated rats (arrows). Original magnification x400. Detail x1000. Images representative of 6/7 animals per group.

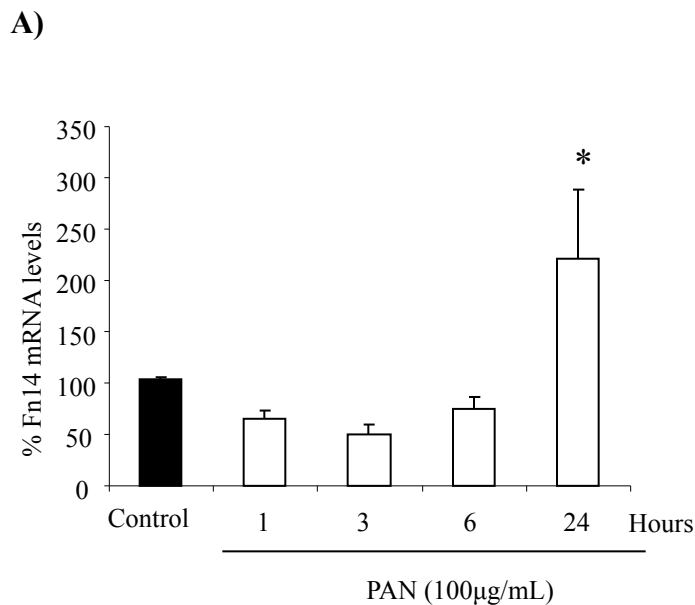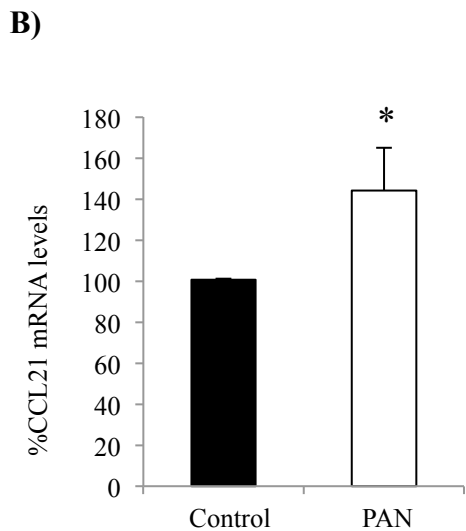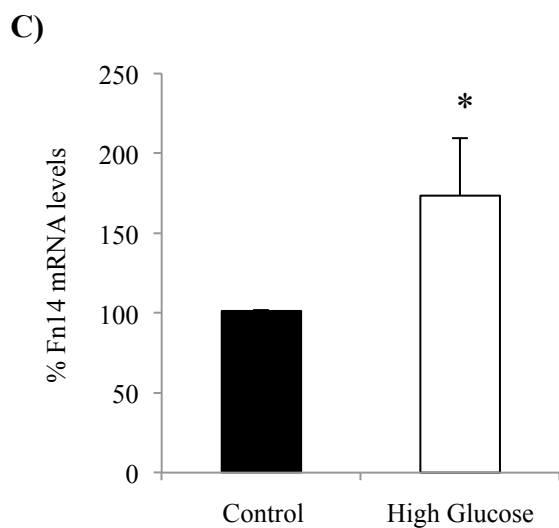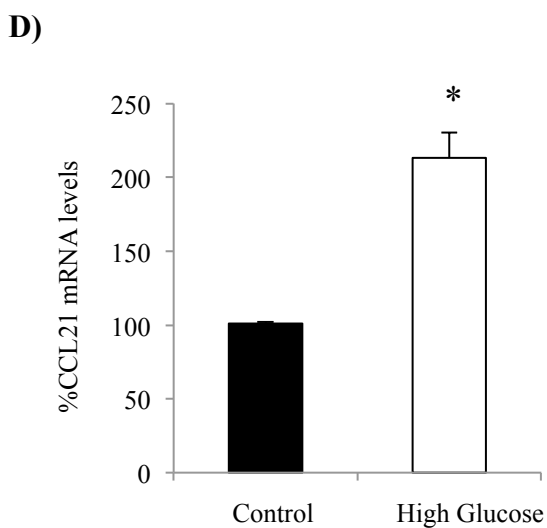

**Supplementary figure 3. Impact of podocyte injury on Fn14 and CCL21 expression.** Podocytes were cultured in presence of a cytotoxic concentration of PAN (100 µM) for up to 24 hours or high glucose for 24 hours. **A,C)** Fn14 mRNA and **B,D)** CCL21 mRNA. Real time RT-PCR. Mean±SD of 3 independent experiments. \*p<0.01 vs control.
